# Supplementary material for: Widespread Discordance of Gene Trees with Species Tree in Drosophila: Evidence for Incomplete Lineage Sorting
Source: PubMed Central journal article supplement (PMC1626107; doi:10.1371/journal.pgen.0020173), 2006-10-27

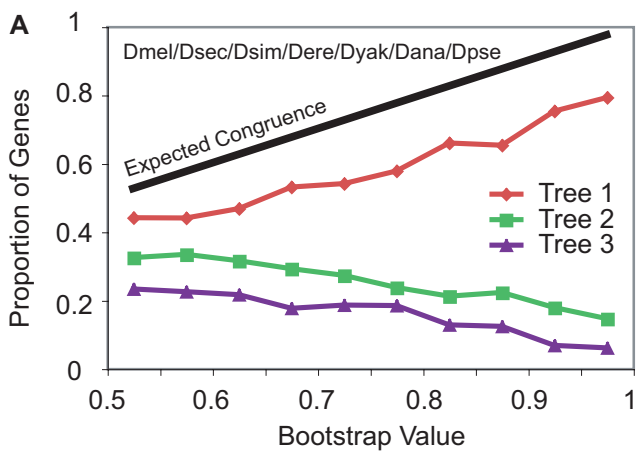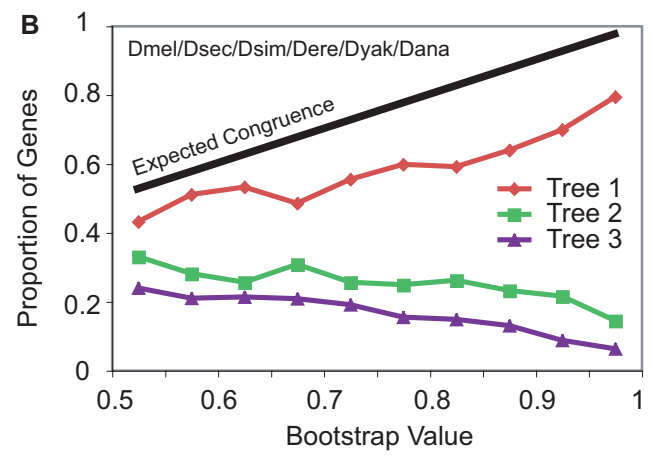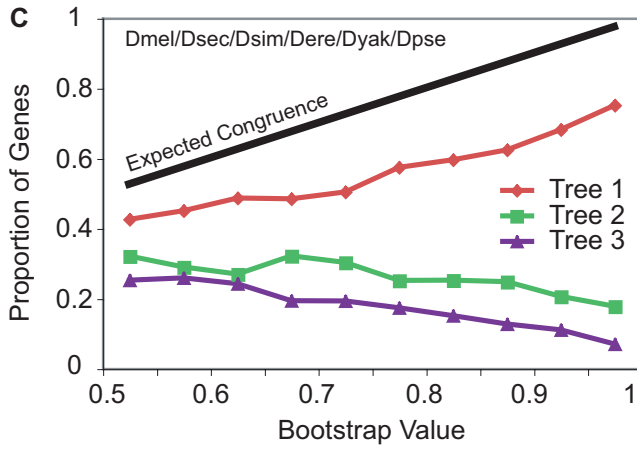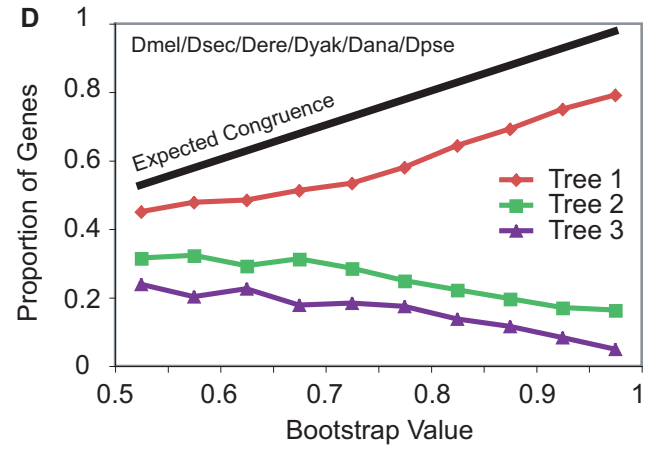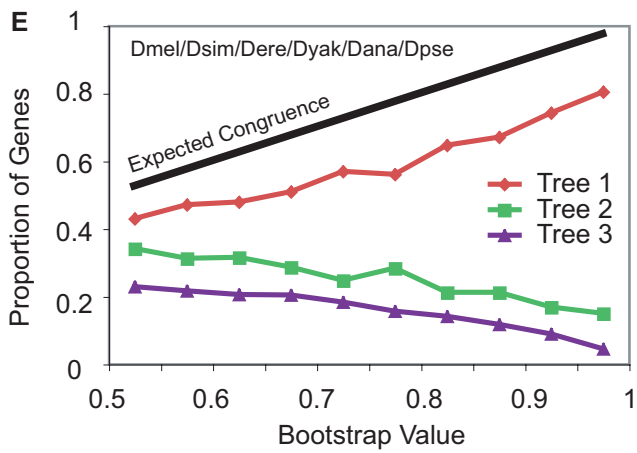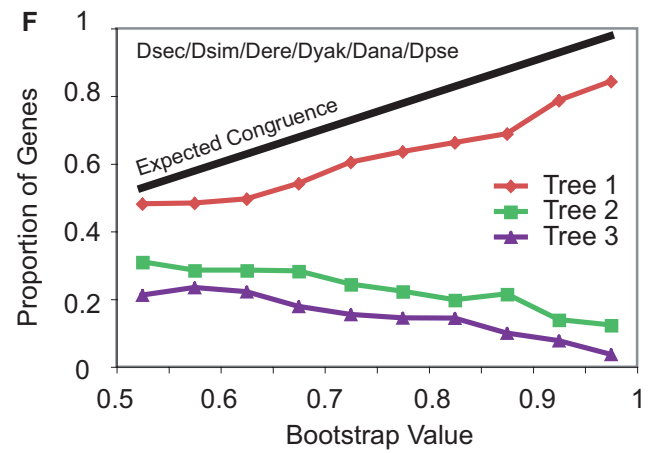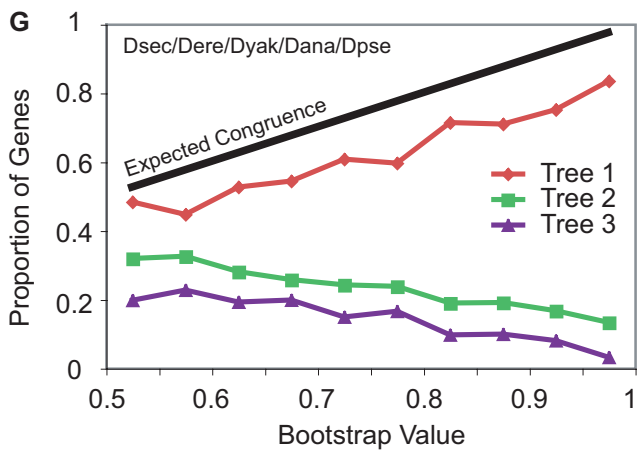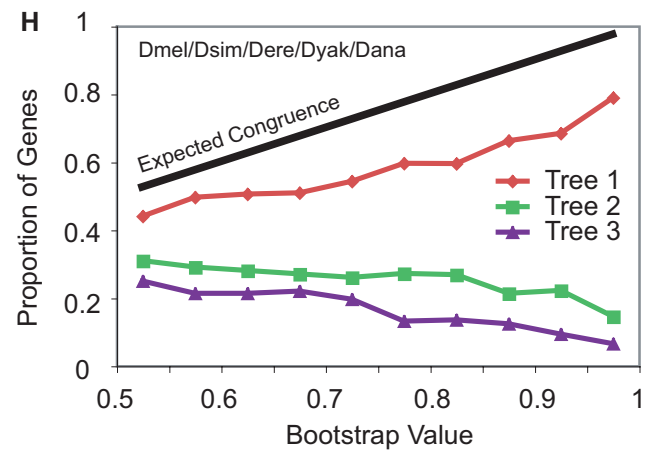

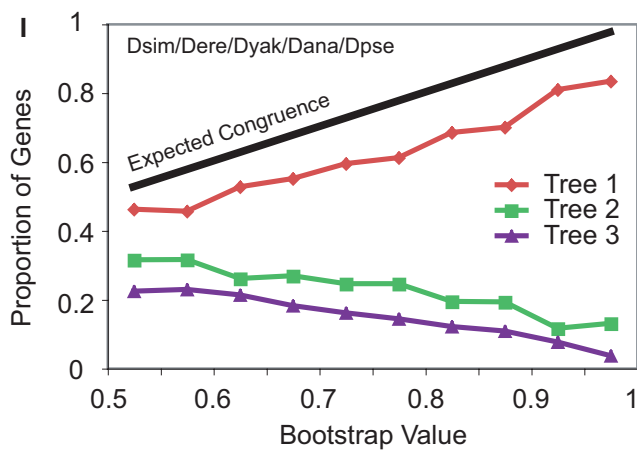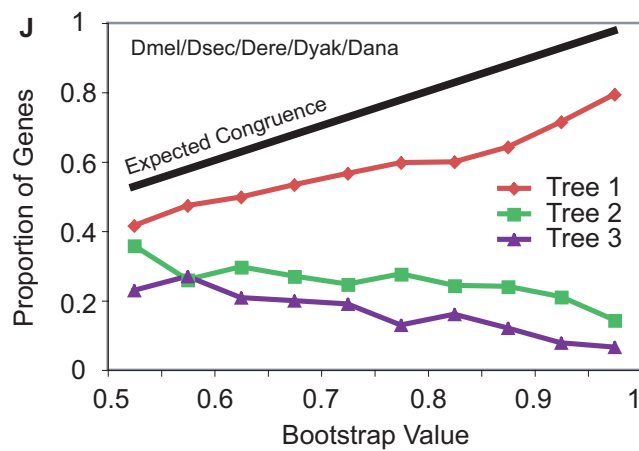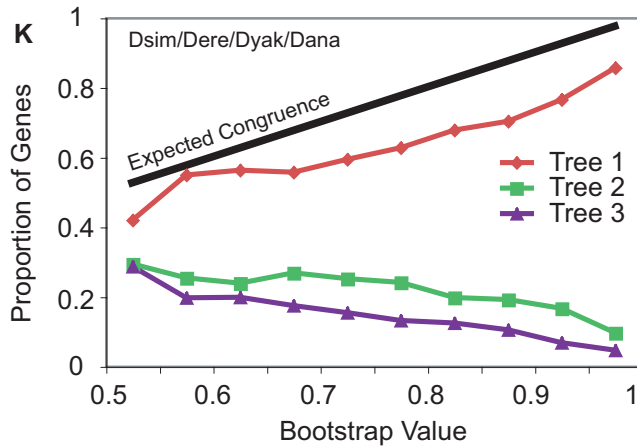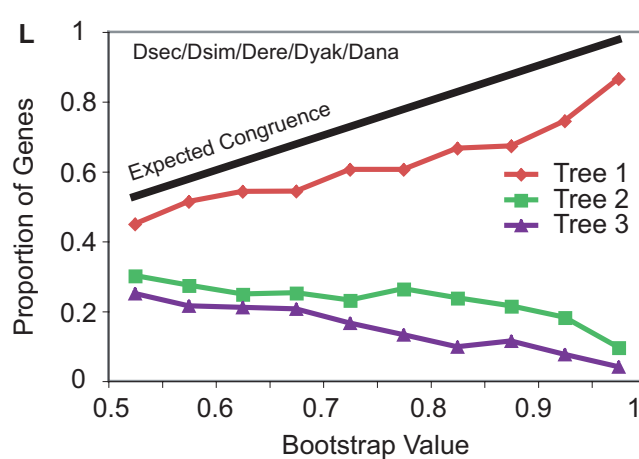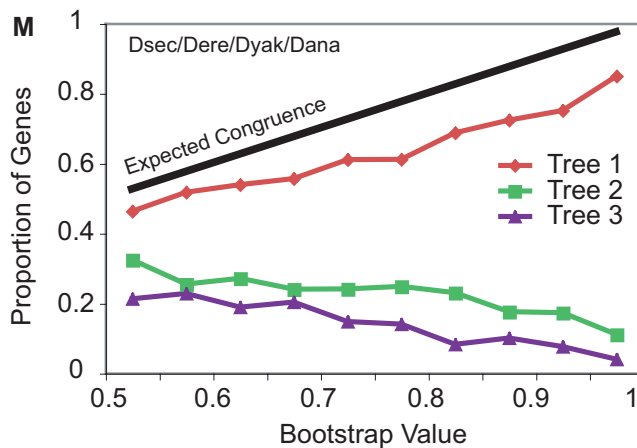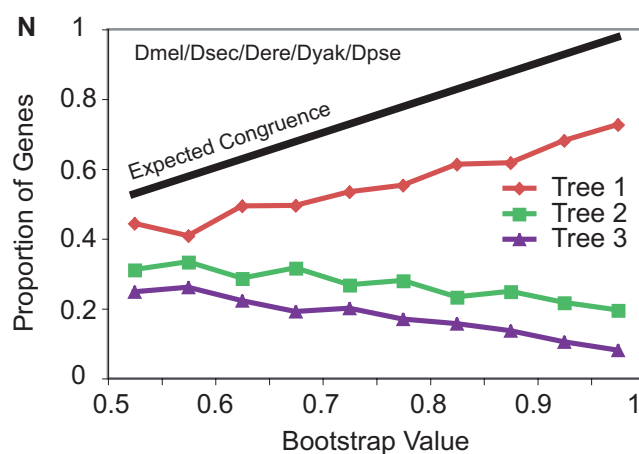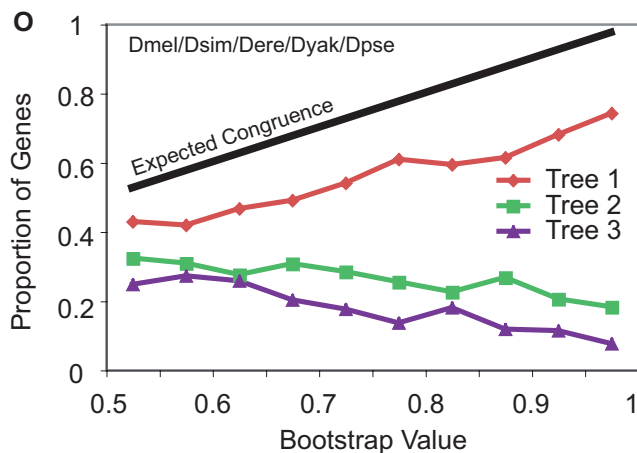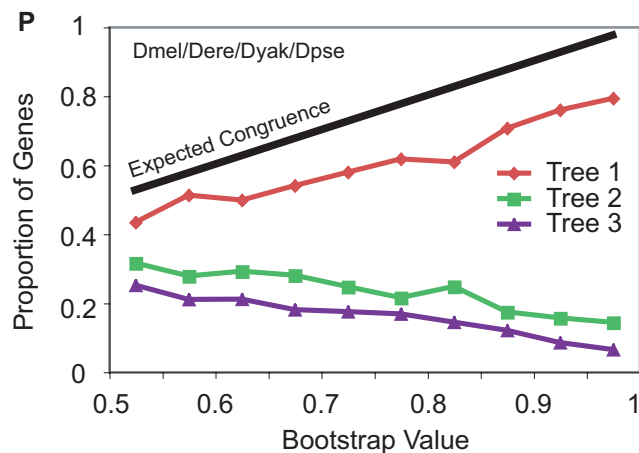

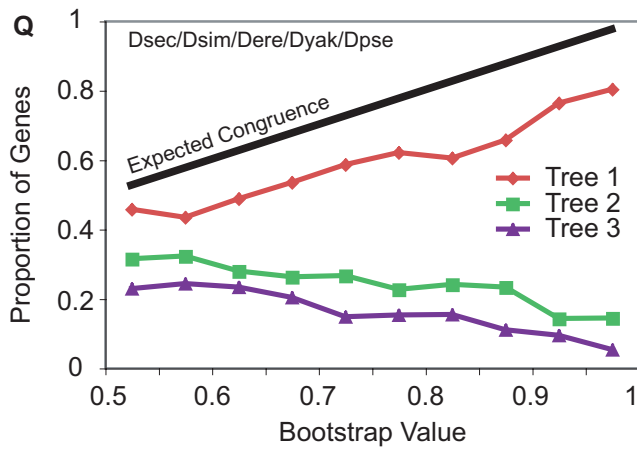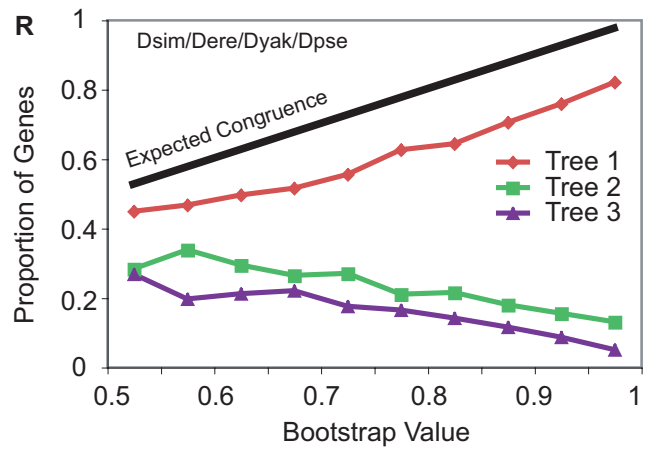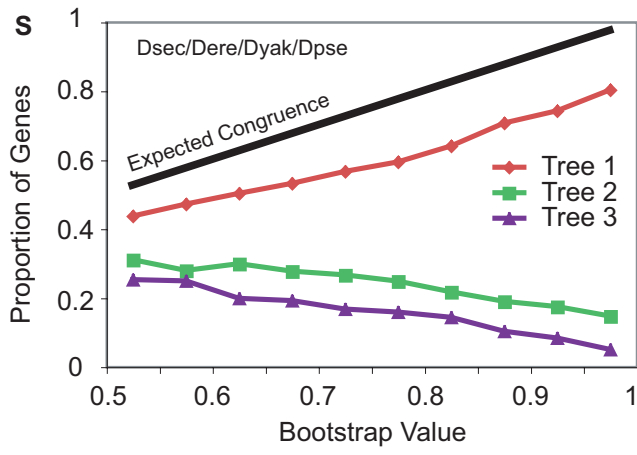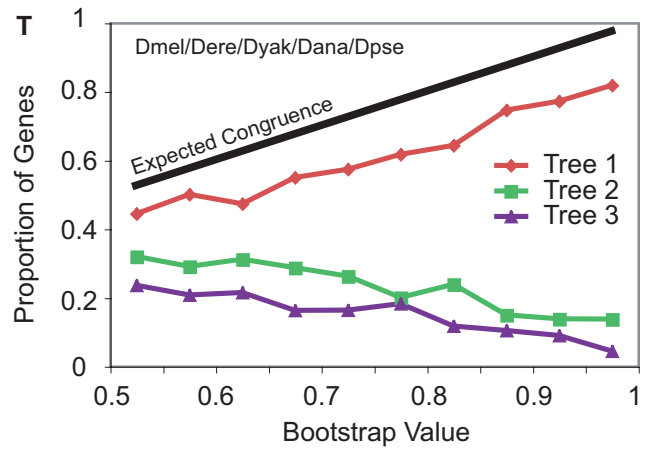

Supplement: pgen.0020173.sg002.pdf [file pgen.0020173.sg002.pdf]
