# Supplementary material for: Widespread Discordance of Gene Trees with Species Tree in Drosophila: Evidence for Incomplete Lineage Sorting
Source: PLoS Genet. 2006 Oct 27;2(10):e173. doi: 10.1371/journal.pgen.0020173 (PMC1626107; doi:10.1371/journal.pgen.0020173)
Supplement: Table S1 — (26 KB XLS) [file pgen.0020173.st001.xls]

## Sheet: spearman_correlations.txt
Property	All		Tree 1		Tree 2		Tree 3		Inconsistent
	rho	p-value	rho	p-value	rho	p-value	rho	p-value	rho	p-value
Dere Quality	-0.0105594	0.3082	-0.0263021	0.0537	0.00268556	0.9001	0.0116314	0.627	0.00479495	0.7432
Dyak Quality	-0.0277455	0.007403	-0.0475875	0.0004795	-0.0106715	0.618	0.0265915	0.2665	-0.032063	0.02846
Dana Quality	-0.00759465	0.4636	-0.0104095	0.4452	0.00109702	0.9591	-0.000700195	0.9767	0.00382213	0.794
Length	0.107453	<1.0E-10	0.137036	<1.0E-10	-0.0320089	0.1346	-0.0273121	0.2537	0.0314378	0.03054
1st Pos Mean GC	-0.0108411	0.2932	-0.0215405	0.1142	0.00611669	0.775	-0.014611	0.5416	-0.012719	0.3816
1st Pos Std GC	-0.0184444	0.0737	-0.0210266	0.1231	0.0207837	0.3314	0.0010511	0.965	0.010677	0.4627
2nd Pos Mean GC	-0.019137	0.06351	-0.0234073	0.08603	0.0240983	0.2601	0.00761342	0.7504	-0.0112415	0.4394
2nd Pos Std GC	-0.010429	0.3119	-0.00808433	0.5533	-0.0235796	0.2705	0.0150983	0.5282	-0.00312006	0.83
3rd Pos Mean GC	-0.067198	<1.0E-10	-0.0917319	<1.0E-10	-0.00493116	0.8178	0.0466392	0.05122	-0.0333001	0.02195
3rd Pos Std GC	-0.00749476	0.4674	-0.026114	0.05545	0.0145397	0.4969	0.0480916	0.04439	0.023254	0.1097
Kappa	-0.0225703	0.02862	-0.0358472	0.00855	-0.00748029	0.7267	0.0299356	0.2109	-0.00875758	0.5469
dN/dS	0.0388408	0.000165	0.0454997	0.000843	-0.00985636	0.6451	-0.0200985	0.401	0.0150944	0.2991
ISD	0.45353	<1.0E-10	0.415955	<1.0E-10	0.379101	<1.0E-10	0.373387	<1.0E-10	0.417019	<1.0E-10
RINSD	0.515136	<1.0E-10	0.468787	<1.0E-10	0.47111	<1.0E-10	0.419265	<1.0E-10	0.479386	<1.0E-10
TSD	-0.00366273	0.7225	0.00971321	0.4763	-0.0472448	0.02718	-0.0242818	0.3103	-0.0123561	0.3954
Property	Consistent		Tree 1 Cons		Tree 2 Cons		Tree 3 Cons
	rho	p-value	rho	p-value	rho	p-value	rho	p-value
Dere Quality	-0.0349158	0.2825	-0.0501961	0.1592	0.0726331	0.4697	0.141105	0.2813
Dyak Quality	-0.0401	0.2171	-0.0558142	0.1174	0.0303403	0.7629	0.191279	0.1429
Dana Quality	-0.0127452	0.6949	-0.0310149	0.3845	-0.0168433	0.867	0.183077	0.1611
Length	0.122315	0.0001552	0.140229	7.95e-05	-0.0239187	0.812	-0.165347	0.2062
1st Pos Mean GC	-0.0366041	0.2589	-0.0488314	0.1708	0.0216321	0.8297	-0.0659924	0.6155
1st Pos Std GC	-0.0333524	0.3036	0.00422656	0.9057	-0.0763966	0.447	-0.0806358	0.5393
2nd Pos Mean GC	0.00897236	0.782	0.0215263	0.5462	0.0853428	0.3955	0.179416	0.1697
2nd Pos Std GC	0.0117318	0.7175	0.0641016	0.07212	-0.29405	0.002941	0.0913815	0.4863
3rd Pos Mean GC	-0.0928565	0.00413	-0.0967558	0.006583	0.0181256	0.857	0.0520992	0.6917
3rd Pos Std GC	-0.0572825	0.07715	-0.0324158	0.3634	0.0181082	0.8571	-0.00480709	0.971
Kappa	-0.0722728	0.02569	-0.0759623	0.03302	-0.0458791	0.6482	-0.181722	0.1643
dN/dS	0.06952	0.0319	0.112208	0.001615	-0.188423	0.05927	0.0732754	0.5769
ISD	0.425233	<1.0E-10	0.43065	<1.0E-10	0.36717	0.0001757	0.257044	0.04766
RINSD	0.468686	<1.0E-10	0.444536	<1.0E-10	0.555808	2.524e-09	0.464753	0.0002158
TSD	-0.0131683	0.6847	0.0324094	0.3635	-0.25281	0.01093	-0.130234	0.3204
